# Supplementary material
Source: PubMed Central journal article supplement (PMC4769660)
Supplement: NIHMS750820-supplement-Figure_S1.pdf [file NIHMS750820-supplement-Figure_S1.pdf]

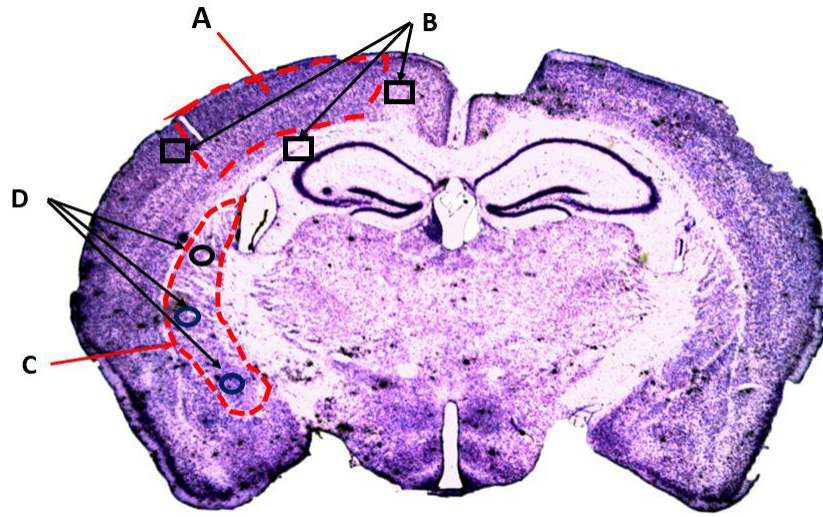

**Fig. S1.** Locations of post-TBI analysis. (A) The injury area. (B) Areas where we analyzed the propidium iodide, Fluoro-Jade B, hydroethidine, and Perls staining. (C) Striatum of the brain. (D) We randomly chose areas in the striatum to calculate the Luxol Fast blue staining and anti-myelin basic protein antibody staining.
